# Supplementary material for: Hybrid carbon source for producing nitrogen-doped polymer nanodots: one-pot hydrothermal synthesis, fluorescence enhancement and highly selective detection of Fe(iii)
Source: Royal Society of Chemistry journal article supplement (doi:10.1039/c3nr02014b), 2013-01-01
Supplement: c3nr02014b.pdf [file c3nr02014b.pdf]

## Supplementary Data

### Hybrid carbon source for producing nitrogen-doped polymer nanodots: one-pot hydrothermal synthesis, fluorescence enhancement and highly selective detection of Fe (III)

Tiantian Lai,<sup>‡a</sup> Enhui Zheng,<sup>‡a</sup> Lixian Chen,<sup>a</sup> Xuyang Wang,<sup>a</sup> Lichun Kong,<sup>a</sup> Chunping You,<sup>b</sup> Yongming Ruan<sup>a\*</sup> and Xuexiang Weng<sup>a\*</sup>

<sup>a</sup>*College of Chemistry and Life Science, Zhejiang Normal University,  
Jinhua 321004, China. Fax: +86-579-82282269; Tel: +86-579-82282269;  
E-mail : ruanym@zjnu.cn; xuexian@zjnu.cn.*

<sup>b</sup>*State Key Laboratory of Dairy Biotechnology, Technology Center, Bright Dairy and Food Co.  
Ltd., Shanghai 200436, China*

\*Corresponding authors. <sup>‡</sup>These authors contributed equally to this work.

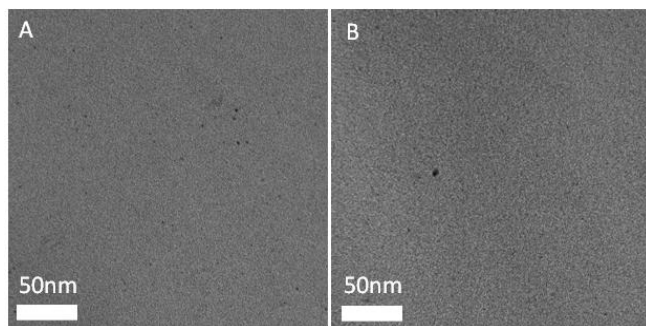

**Fig.S1** TEM images of PNDs-Sa (A) and PNDs-Sb (B).

**Table S1.** The QYs of PNDs from single sources (In (Teflon)-lined autoclave/150 °C for 50 min).

| Serial | PNDs from single carbon source |             | QY standardized by quinine sulfate (%) | Maximum excitation wavelength |
|--------|--------------------------------|-------------|----------------------------------------|-------------------------------|
| 1      | Xylose, 0.6 g                  | Water, 30mL | 0.55                                   | 330nm                         |
| 2      | Glucose, 0.6 g                 | Water, 30mL | 0.14                                   | 330nm                         |
| 3      | Sucrose, 0.6 g                 | Water, 30mL | 1.02                                   | 334nm                         |
| 4      | Glycine, 0.6 g                 | Water, 30mL | 0.52                                   | 332nm                         |
| 5      | Alanine, 0.6 g                 | Water, 30mL | 0.57                                   | 336nm                         |
| 6      | Phenylalanine, 0.6 g           | Water, 30mL | 1.65                                   | 338nm                         |
| 7      | Glycylglycine, 0.6 g           | Water, 30mL | 1.80                                   | 340nm                         |
| 8      | BSA, 0.6 g                     | Water, 30mL | 0.77                                   | 332nm                         |

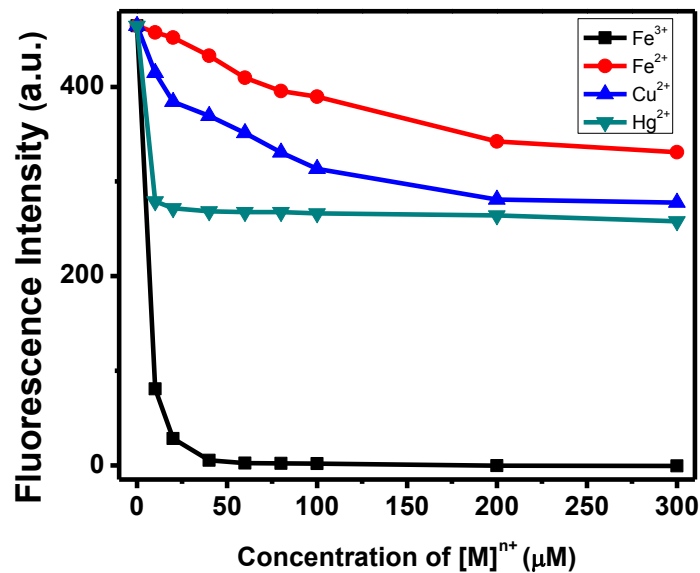

**Fig.S2** The difference in fluorescence intensity at 425 nm of PNDs dispersion under various concentrations  $[M]^{n+}$  (excitation at 340 nm).

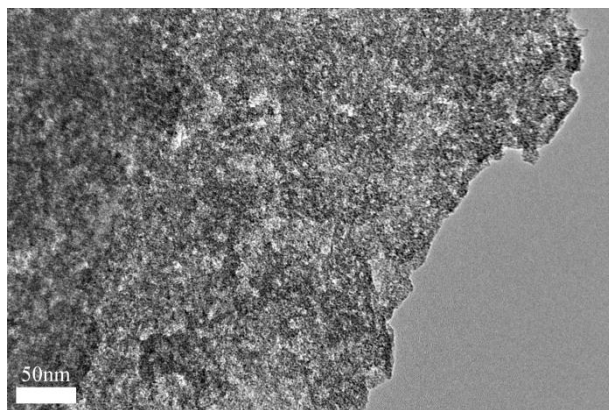

**Fig. S3** TEM image of PNDs-Fe<sup>3+</sup>.
